# Supplementary material for: Prognostic value of myocardial strain and late gadolinium enhancement on cardiovascular magnetic resonance imaging in patients with idiopathic dilated cardiomyopathy with moderate to severely reduced ejection fraction
Source: Springer Nature journal article supplement (doi:10.1186/s12968-018-0466-7), 2018-02-01
Supplement: MOESM1 [file 15843184]

## **Additional file 1**

This appendix has been provided by the authors to give readers additional information about their work.

### **Prognostic value of myocardial strain and late gadolinium enhancement on cardiac magnetic resonance imaging in patients with idiopathic dilated cardiomyopathy with severely reduced ejection fraction**

Seung-Hoon Pi, MD<sup>1,\*</sup>, Sung Mok Kim, MD, PhD<sup>2,\*</sup>, Jin-Oh Choi, MD, PhD<sup>1</sup>, Eun Kyoung Kim, MD, PhD<sup>1</sup>, Sung-A Chang, MD, PhD<sup>1</sup>,  
Yeon Hyeon Choe, MD, PhD<sup>2</sup>, Sang-Chol Lee, MD, PhD<sup>1</sup>, Eun-Seok Jeon, MD, PhD<sup>1</sup>

#### **Table of content of the Additional file 1**

- I. Supplementary Tables

## I. Supplementary Tables

**Table S1** Baseline characteristics between 172 included and 95 excluded patients.

| <i>Parameters</i>                           | <i>Patients who included (n=172)</i> | <i>Patients who excluded (n=95)</i> | <i>P value</i> |
|---------------------------------------------|--------------------------------------|-------------------------------------|----------------|
| Age (years)                                 | 56.4 ± 14.3                          | 57.7 ± 14.0                         | 0.477          |
| Male gender, n (%)                          | 116 (67.4)                           | 70 (73.7)                           | <0.001         |
| Mean arterial pressure (mmHg)               | 84 ± 13                              | 85 ± 13                             | 0.734          |
| Hypertension, n (%)                         | 58 (33.7)                            | 31 (32.6)                           | 0.857          |
| Diabetes mellitus, n (%)                    | 36 (20.9)                            | 15 (15.8)                           | 0.306          |
| Dyslipidemia, n (%)                         | 11 (6.4)                             | 3 (3.2)                             | 0.256          |
| Current smoker, n (%)                       | 49 (28.5)                            | 31 (32.6)                           | 0.738          |
| Chronic kidney disease <sup>*</sup> , n (%) | 31 (18.0)                            | 16 (16.8)                           | 0.808          |
| Previous CVA, n (%)                         | 4 (2.3)                              | 6 (6.3)                             | 0.100          |
| Body mass index (kg/m <sup>2</sup> )        | 24.0 ± 4.5                           | 23.4 ± 3.9                          | 0.220          |
| ECG at baseline                             |                                      |                                     |                |
| Heart rate (bpm)                            | 83 ± 20                              | 79 ± 18                             | 0.061          |
| Left bundle-branch block, n (%)             | 31 (18.0)                            | 5 (5.3)                             | 0.003          |
| QRS duration (ms)                           | 113 ± 29                             | 108 ± 25                            | 0.144          |
| Laboratory data                             |                                      |                                     |                |
| Serum creatinine (mg/dl)                    | 0.97 ± 0.27                          | 1.01 ± 0.31                         | 0.247          |

|                          |             |             |       |
|--------------------------|-------------|-------------|-------|
| Na (mmol/l)              | 139.6 ± 3.3 | 139.0 ± 3.3 | 0.218 |
| ln(NT-proBNP) (pg/ml)    | 7.22 ± 1.27 | 7.25 ± 1.20 | 0.809 |
| Cardiac medications      |             |             |       |
| Beta-blockers, n (%)     | 120 (69.8)  | 57 (60.0)   | 0.106 |
| ACE-inhibitors/ARB, n(%) | 143 (83.1)  | 82 (86.3)   | 0.495 |
| Spironolactone, n (%)    | 101 (58.7)  | 58 (61.1)   | 0.710 |
| Diuretics, n (%)         | 125 (72.7)  | 75 (78.9)   | 0.258 |
| Digoxin, n (%)           | 33 (19.2)   | 31 (32.6)   | 0.014 |

Primary outcome: all-cause death, heart transplantation during follow-up. Values are mean ± SD, n(%).

\*Chronic kidney disease was defined as eGFR < 60ml/min/1.73m<sup>2</sup>, calculated using the 4-component MDRD study equation.

Abbreviations: ACE, angiotensin-converting-enzyme; ARB, angiotensin II receptor blockers; BNP, B-type natriuretic peptide; CVA, cerebrovascular accident; ECG, electrocardiography

**Table S2** Baseline standard CMR-data between 172 included and 95 excluded patients.

| <i>Parameters</i>                     | <i>Patients who included (n=172)</i> | <i>Patients who excluded (n=95)</i> | <i>P value</i> |
|---------------------------------------|--------------------------------------|-------------------------------------|----------------|
| LV EF (%)                             | 23.7 ± 7.9                           | 24.8 ± 7.3                          | 0.269          |
| LV EDV (ml)                           | 284.3 ± 91.4                         | 264.6 ± 96.3                        | 0.099          |
| LV ESV (ml)                           | 219.9 ± 85.7                         | 201.2 ± 83.2                        | 0.087          |
| Cardiac output (L/min)                | 5.04 ± 1.53                          | 5.05 ± 2.44                         | 0.960          |
| Cardiac index (L/min/m <sup>2</sup> ) | 2.95 ± 0.84                          | 2.96 ± 1.31                         | 0.916          |
| RV EF (%)                             | 41.2 ± 17.0                          | 39.2 ± 13.4                         | 0.342          |
| RV EDV (ml)                           | 145.6 ± 60.7                         | 156.4 ± 66.6                        | 0.184          |
| RV ESV (ml)                           | 91.6 ± 56.7                          | 100.4 ± 59.1                        | 0.232          |
| RV cardiac output (L/min)             | 4.21 ± 1.33                          | 4.36 ± 1.50                         | 0.422          |
| Presence of LGE, n (%)                | 66 (38.4)                            | 43 (47.3)                           | 0.215          |
| Myocardial mass (g)                   | 142.2 ± 41.1                         | 129.5 ± 37.3                        | 0.014          |
| Quantitative LGE mass (g)             | 6.8 ± 14.5                           | 5.7 ± 10.2                          | 0.521          |
| LGE mass/LV myocardial mass (%)       | 4.7 ± 9.5                            | 4.5 ± 7.6                           | 0.845          |

Primary outcome: all-cause death, heart transplantation. Values are mean ± SD, n(%).

Abbreviations: CMR, cardiac magnetic resonance; EDV, end-diastolic volume; EF, ejection fraction; ESV, end-systolic volume; LGE, late gadolinium enhancement; LV, left ventricle; RV, right ventricle
